# Supplementary material for: Hierarchical CoP@Ni2P core–shell nanosheets for ultrahigh energy density asymmetric supercapacitors
Source: Royal Society of Chemistry journal article supplement (doi:10.1039/d0qi00024h), 2020-01-01
Supplement: d0qi00024h1.pdf [file d0qi00024h1.pdf]

# Electronic Supplementary Information

## Hierarchical CoP@Ni<sub>2</sub>P core-shell nanosheets for high-energy density asymmetric supercapacitors

Liang Jiang,<sup>a c</sup> Ming Yan,<sup>b</sup> Lin Sun,<sup>a</sup> Yu Liu,<sup>a</sup> Hongye Bai,<sup>a</sup> Weidong Shi<sup>a, \*</sup>

<sup>a</sup> School of Chemistry and Chemical Engineering, Jiangsu University, Zhenjiang 212013, PR China. E-mail: [swd1978@ujs.edu.cn](mailto:swd1978@ujs.edu.cn); Tel: +86-51188791800

<sup>b</sup> Institute of Green Chemistry and Technology, School of Chemistry and Chemical Engineering, Jiangsu University, Zhenjiang 212013, PR China.

<sup>c</sup> 114 Geological Brigade, Guizhou Bureau of Geology and Mineral Resources, Guizhou Province, Zunyi 563000, China

# Table of Contents

|                                                                                                                                                     |    |
|-----------------------------------------------------------------------------------------------------------------------------------------------------|----|
| Supplementary Figures.....                                                                                                                          | S3 |
| Figure S1. The nitrogen sorption isotherms and BJH pore size distributions of the samples.....                                                      | S3 |
| Figure. S2. The composition analysis of CoP@Ni <sub>2</sub> P/CP by TEM-EDX.....                                                                    | S3 |
| Fig. S3. The line scan of energy spectrum images of CoP@Ni <sub>2</sub> P NSs/CP.....                                                               | S4 |
| Figure S4. The XRD of Co <sub>3</sub> O <sub>4</sub> /CP, Co <sub>3</sub> O <sub>4</sub> @Ni(OH) <sub>2</sub> /CP and CoP@Ni <sub>2</sub> P/CP..... | S4 |
| Figure S5. The XPS survey spectrum of the CoP@Ni <sub>2</sub> P NSs/CP.....                                                                         | S5 |
| Figure S6. The composition analysis of $\alpha$ -Fe <sub>2</sub> O <sub>3</sub> by TEM-EDX.....                                                     | S5 |
| Figure S7. The XPS survey spectrum of the $\alpha$ -Fe <sub>2</sub> O <sub>3</sub> /CP.....                                                         | S6 |
| Figure S8. The CV and GCD curves of the Ni <sub>2</sub> P/CP.....                                                                                   | S6 |
| Figure S9. The CV and GCD curves of the CoP/CP.....                                                                                                 | S6 |
| Figure S10. The Enlarged part of different electrodes EIS impedance.....                                                                            | S7 |
| Figure S11. The CV and GCD curves of the Ni <sub>2</sub> P/CP CoP@Ni <sub>2</sub> P NSs/CP test with Hg/HgO electrode.....                          | S7 |
| Figure S12. The CV and GCD curves of the $\alpha$ -Fe <sub>2</sub> O <sub>3</sub> /CP Ni <sub>2</sub> P/CP test with Hg/HgO electrode.....          | S7 |

## Supplementary Figures

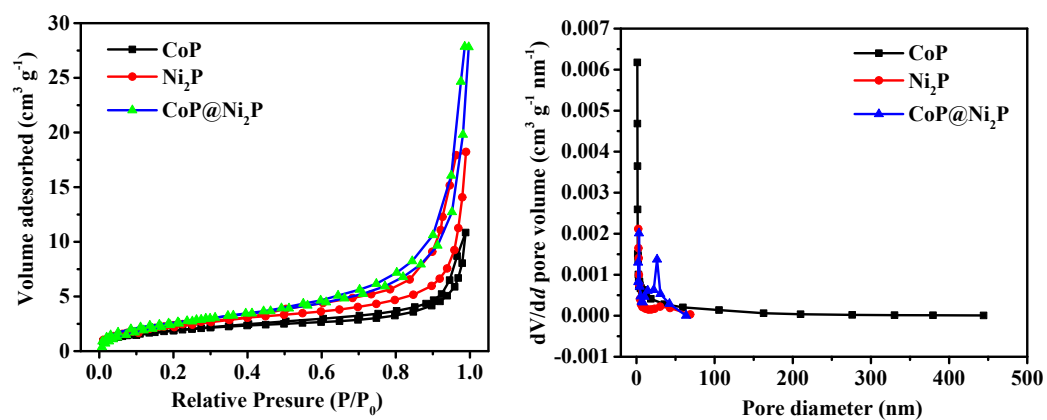

**Figure S1.** The nitrogen sorption isotherms and BJH pore size distributions of the CoP, Ni<sub>2</sub>P, CoP@Ni<sub>2</sub>P sample.

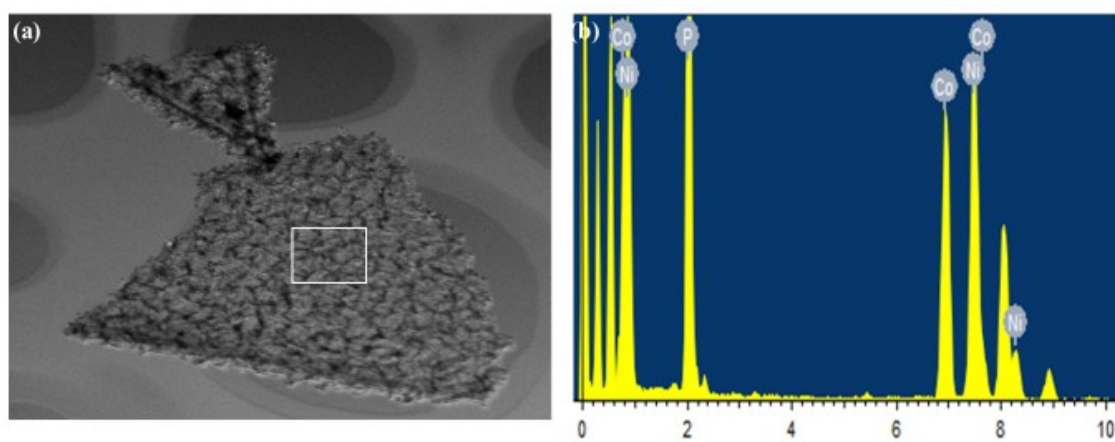

**Fig. S2.** The composition analysis of CoP@Ni<sub>2</sub>P/CP by TEM-EDX

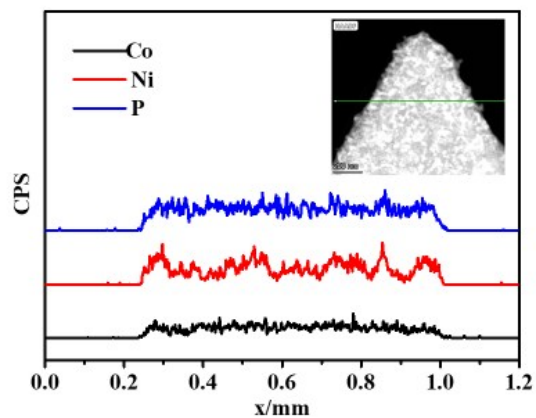

**Fig. S3.** The line scan of energy spectrum images of CoP@Ni<sub>2</sub>P NSs/CP

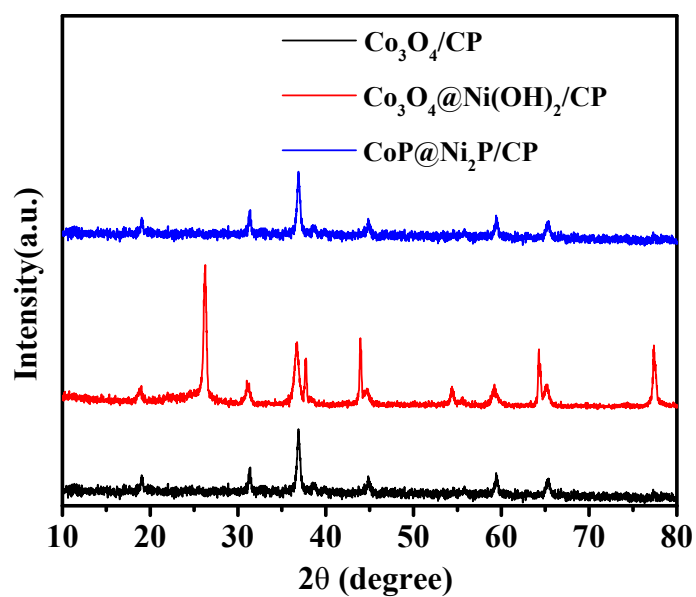

**Fig. S4.** The XRD of Co<sub>3</sub>O<sub>4</sub>/CP, Co<sub>3</sub>O<sub>4</sub>@Ni(OH)<sub>2</sub>/CP and CoP@Ni<sub>2</sub>P/CP

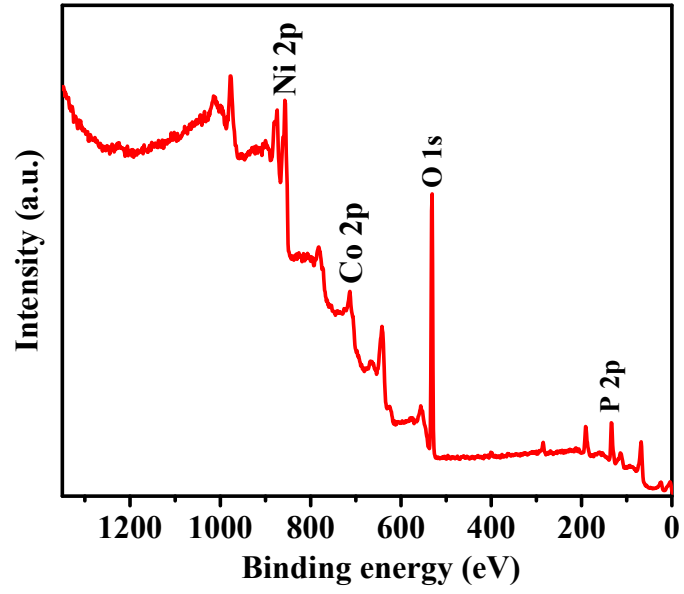

**Fig. S5.** The XPS survey spectrum of the CoP@Ni<sub>2</sub>P NSs/CP

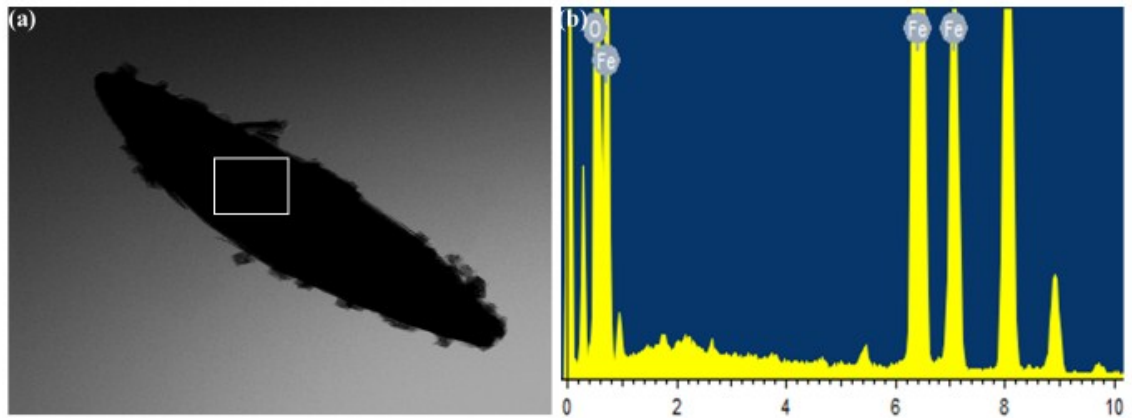

**Fig. S6.** The composition analysis of  $\alpha$ -Fe<sub>2</sub>O<sub>3</sub> by TEM-EDX

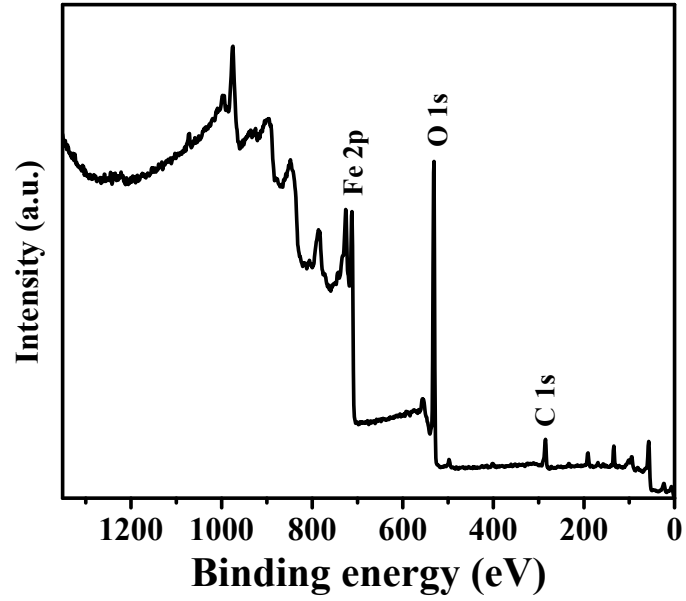

Fig. S7. The XPS survey spectrum of the  $\alpha$ -Fe<sub>2</sub>O<sub>3</sub>/CP

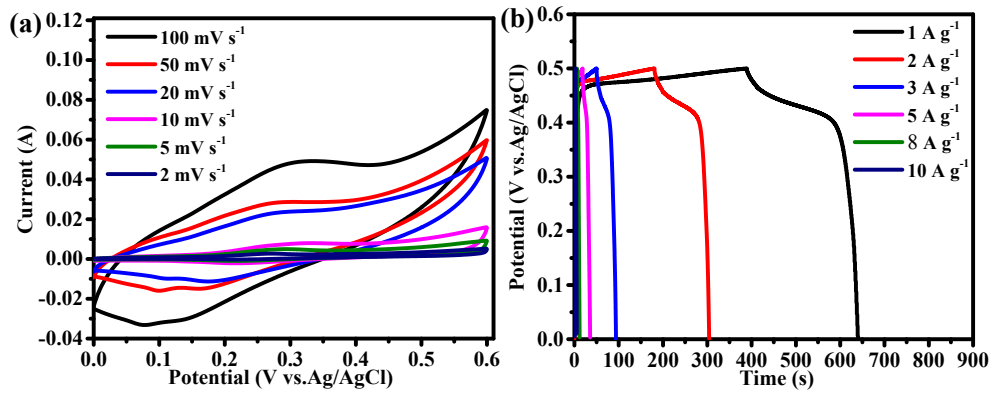

Fig. S8. The CV and GCD curves of the Ni<sub>2</sub>P/CP

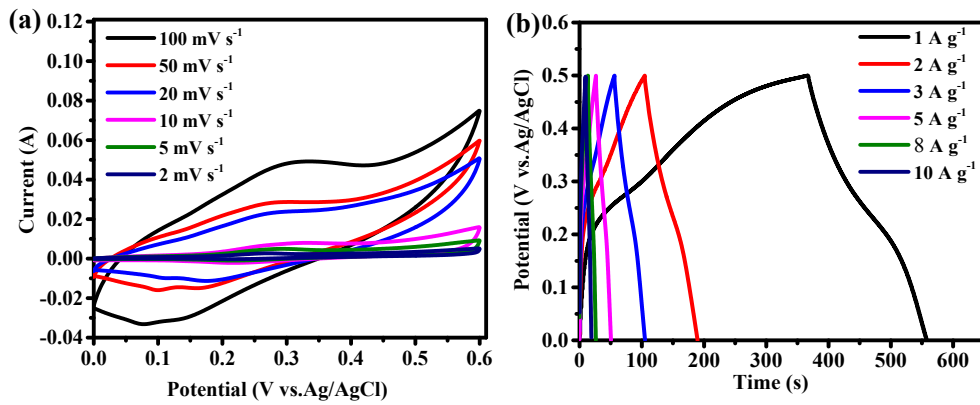

Fig. S9. The CV and GCD curves of the CoP/CP

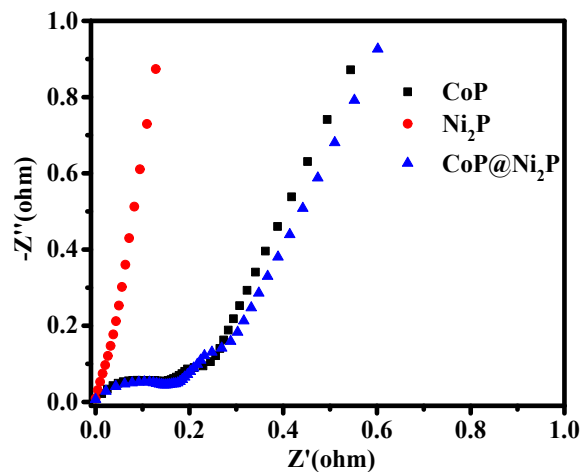

**Figure S10.** The Enlarged part of different electrodes EIS impedance.

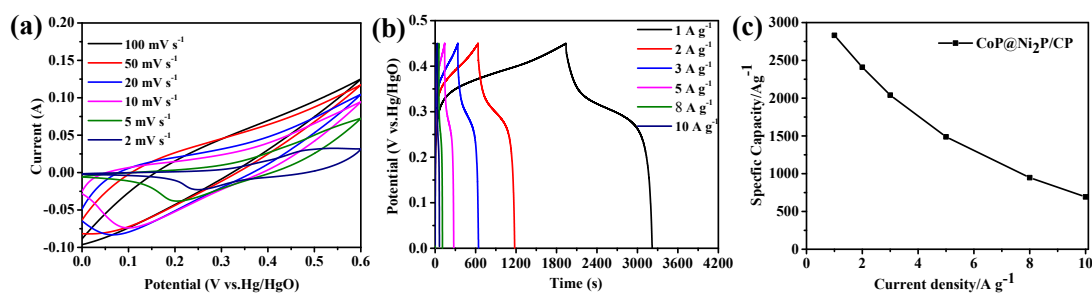

**Figure S11.** CV curves of CoP@Ni<sub>2</sub>P NSs/CP electrode at various scan rates (a), GCD curves of CoP@Ni<sub>2</sub>P NSs/CP electrode and specific capacitance at various current densities (b, c).

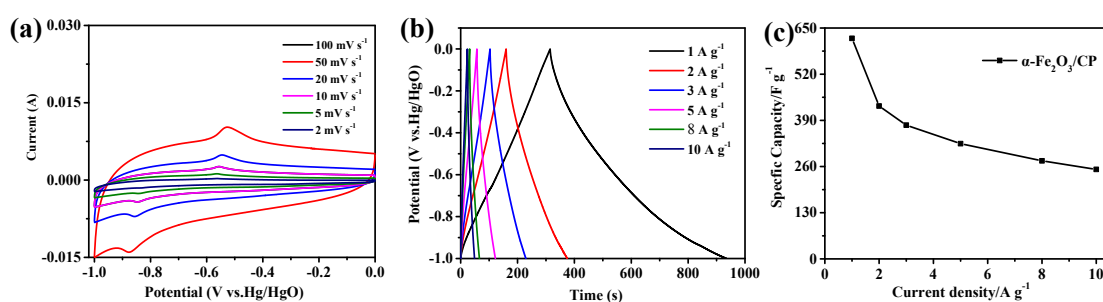

**Figure S12.** CV curves of  $\alpha$ -Fe<sub>2</sub>O<sub>3</sub>/CP electrode at various scan rates (a), GCD curves of  $\alpha$ -Fe<sub>2</sub>O<sub>3</sub>/CP electrode and specific capacitance at various current densities (b, c).
